# Supplementary material for: Sensing by Molecularly Imprinted Polymer: Evaluation of the Binding Properties with Different Techniques
Source: PubMed Central journal article supplement (PMC6470915; doi:10.3390/s19061344), 2019-03-18
Supplement: sensors-19-01344-s001.pdf [file sensors-19-01344-s001.pdf]

# Sensing by Molecularly Imprinted Polymer: Evaluation of the Binding Properties with Different Techniques

Maria Pesavento <sup>1,\*</sup>, Simone Marchetti <sup>1</sup>, Letizia De Maria <sup>2</sup>, Luigi Zeni <sup>3</sup> and Nunzio Cennamo <sup>3</sup>

<sup>1</sup> Department of Chemistry, University of Pavia, 27100 Pavia PV, Italy; [simone.marchetti01@universitadipavia.it](mailto:simone.marchetti01@universitadipavia.it)

<sup>2</sup> Research on the Energetic System, 20134 Milan, Italy; [Letizia.DeMaria@rse-web.it](mailto:Letizia.DeMaria@rse-web.it)

<sup>3</sup> Department of Engineering, University of Campania Luigi Vanvitelli, 81031 Aversa, Italy; [luigi.zeni@unicampania.it](mailto:luigi.zeni@unicampania.it) (L.Z.); [nunzio.cennamo@unicampania.it](mailto:nunzio.cennamo@unicampania.it) (N.C.)

\* Correspondence: [maria.pesavento@unipv.it](mailto:maria.pesavento@unipv.it)

UV spectra of furanic compounds

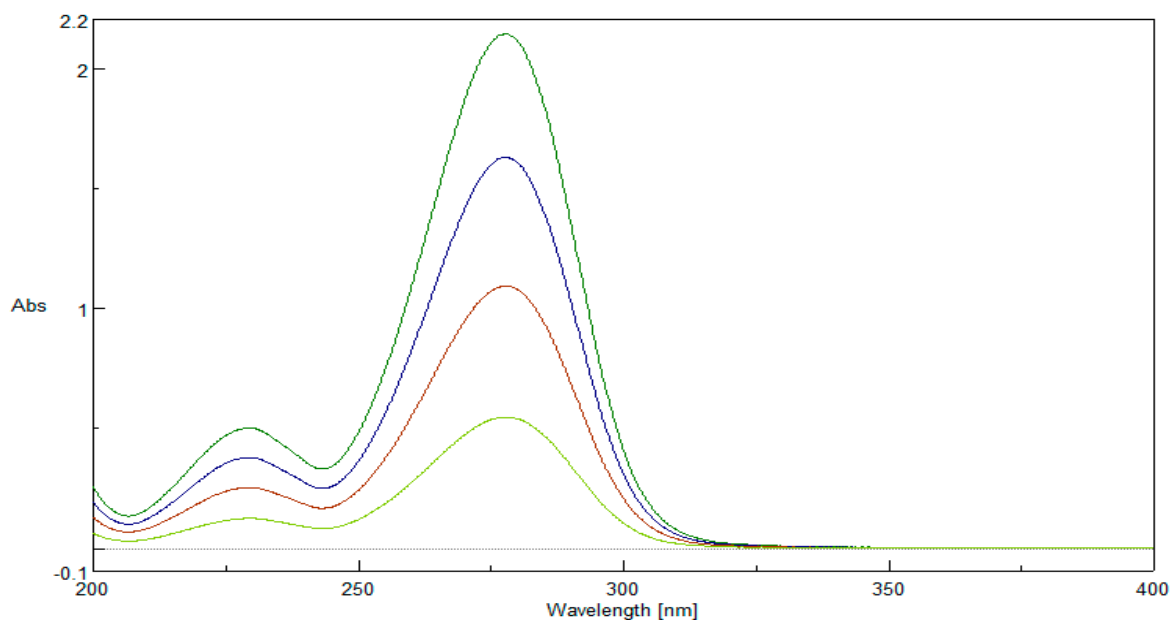

**Figure S1.** UV spectra of 2-FAL, in 0.75H<sub>2</sub>O:0.25EtOH.  $3.02 \times 10^{-5}$  M (light green);  $6.04 \times 10^{-5}$  M (brown);  $9.06 \times 10^{-5}$  M (blue);  $12.08 \times 10^{-5}$  M (green).

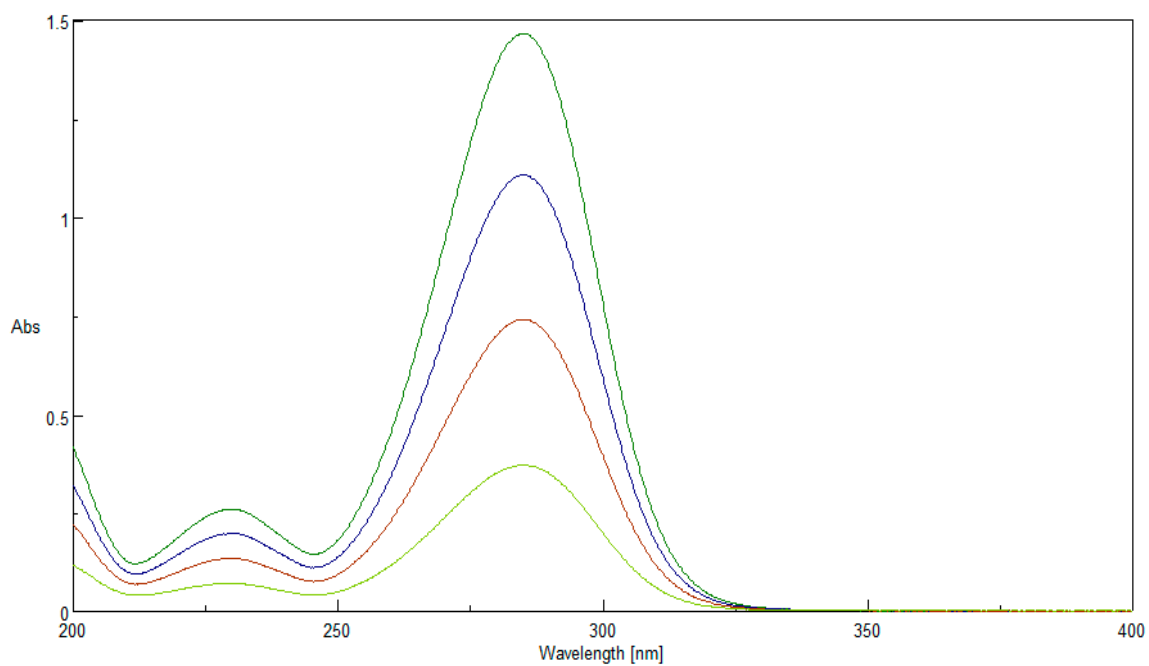

**Figure S2.** UV spectra of HMF, in 0.75H<sub>2</sub>O:0.25EtOH.  $1.95 \times 10^{-5}$  M (light green);  $3.91 \times 10^{-5}$  M (brown);  $5.96 \times 10^{-5}$  M (blue);  $7.81 \times 10^{-5}$  M (green).

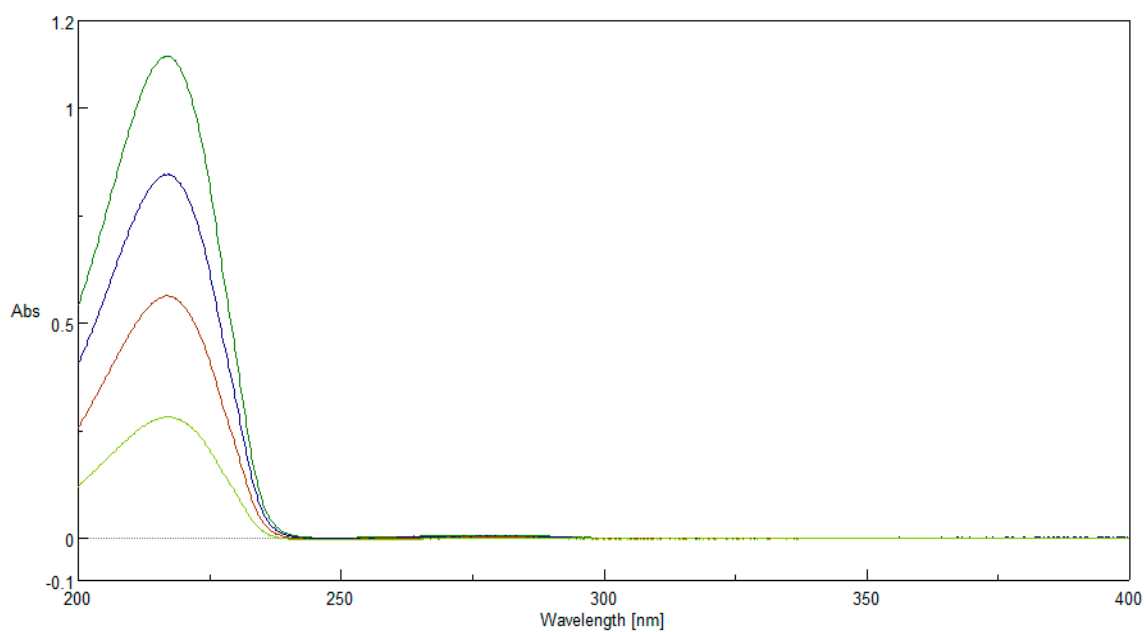

**Figure S3.** UV spectra of FA, in 0.75 H<sub>2</sub>O:0.25 EtOH.  $2.89 \times 10^{-5}$  M (light green);  $5.79 \times 10^{-5}$  M (brown);  $8.69 \times 10^{-5}$  M (blue);  $11.58 \times 10^{-5}$  M (green).
